# Supplementary material
Source: PubMed Central journal article supplement (PMC4665643)
Supplement: NIHMS734189-supplement-ESI.pdf [file NIHMS734189-supplement-ESI.pdf]

## Supplementary Information

### Isolating single cells in a neurosphere assay using inertial microfluidics

S. Shiva P. Nathamgari,<sup>a</sup> Biqin Dong,<sup>b</sup> Fan Zhou,<sup>b</sup> Wonmo Kang,<sup>b,c,1</sup> Juan P. Giraldo-Vela,<sup>b,c</sup> Tammy McGuire,<sup>d</sup> Rebecca L. McNaughton,<sup>b,c</sup> Cheng Sun,<sup>b</sup> John A. Kessler,<sup>d</sup> and Horacio D. Espinosa<sup>a,b,c\*</sup>

<sup>a</sup> Department of Theoretical and Applied Mechanics, Northwestern University, Evanston, IL 60208, USA

<sup>b</sup> Department of Mechanical Engineering, Northwestern University, Evanston, IL 60208, USA

<sup>c</sup> iNfinitesimal LLC, Skokie, IL 60077, USA

<sup>d</sup> Department of Neurology, Northwestern University, Chicago, IL 60611, USA

\*Corresponding author: [espinosa@northwestern.edu](mailto:espinosa@northwestern.edu), Phone: 847-467-5989, Fax: 847-491-3915

#### 1. Immunostaining to estimate the percentage of stem cells in our E13 cultures

The dissociated neurospheres were stained with proliferative markers Nestin, Ki67+ as well as lineage commitment markers for neurons (TuJ1) and astrocytes (GFAP).

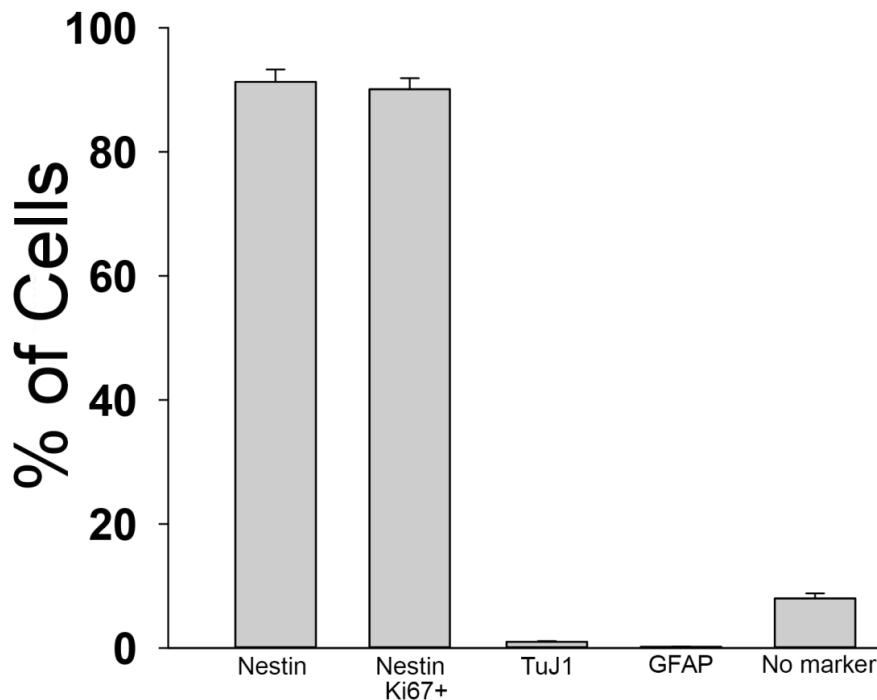

**Figure S1:** Percentage of proliferative and lineage committed cells in the dissociated neurospheres. Immunostaining was performed 6 hrs after dissociation.

<sup>1</sup> currently at US Naval Research Laboratory, Washington, DC 20375

## 2. Membrane integrity studies using trypan-blue viability assay

The percentage of viable cells was estimated using trypan-blue dye and a hemocytometer. Because the dissociation step can itself be a source of reduced viability, we performed studies on both dissociated and dissociated+sorted cells. We adjusted the concentration of cells to yield at least >75 cells in each count. The four corner and the center squares of the hemocytometer were used to count cells. The % of viable cells was ~ 92% in the control case and ~ (90±1)% after sorting, thus demonstrating the negligible effect of sorting. (Data reported as mean ± standard error)

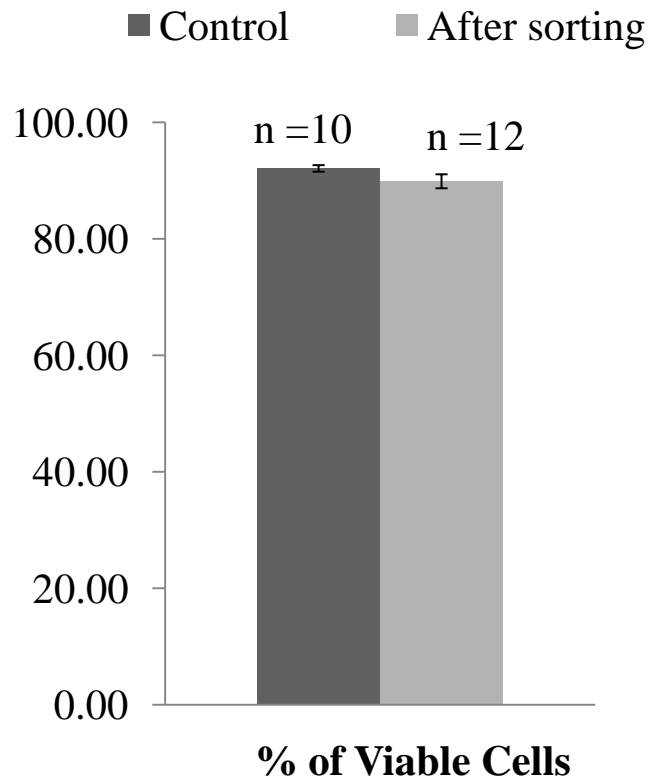

**Figure S2:** Percentage of viable cells after different experimental steps, estimated using trypan-blue viability assay.
